# Supplementary material for: Cu and Ni dual-doped ZnO nanostructures templated by cellulose nanofibrils for the boosted visible-light photocatalytic degradation of wastewater pollutants
Source: Royal Society of Chemistry journal article supplement (doi:10.1039/d3gc04163h), 2023-01-01
Supplement: d3gc04163h1.pdf [file d3gc04163h1.pdf]

Electronic Supplementary Information

for

**Cu and Ni dual-doped ZnO nanostructures templated by cellulose nanofibrils with boosted  
visible light photocatalytic degradation of wastewater pollutants**

Contents

|                                                                                                                                                                                                             |   |
|-------------------------------------------------------------------------------------------------------------------------------------------------------------------------------------------------------------|---|
| Experimental.....                                                                                                                                                                                           | 2 |
| Fig. S1 EDS mapping of (a) ZnO <sub>0.2</sub> @CNF, (b) ZnO <sub>0.3</sub> @CNF, (c) ZnO <sub>0.4</sub> @CNF, (d) ZnO <sub>0.5</sub> @CNF, (e) ZnO <sub>0.6</sub> @CNF and (f) ZnO <sub>0.7</sub> @CNF..... | 3 |
| Fig. S2 XRD patterns of ZnO <sub>0.2</sub> @CNF, ZnO <sub>0.3</sub> @CNF, ZnO <sub>0.4</sub> @CNF, ZnO <sub>0.5</sub> @CNF, ZnO <sub>0.6</sub> @CNF and ZnO <sub>0.7</sub> @CNF.....                        | 3 |
| Fig. S3 FT-IR spectra of ZnO <sub>0.2</sub> @CNF, ZnO <sub>0.3</sub> @CNF, ZnO <sub>0.4</sub> @CNF, ZnO <sub>0.5</sub> @CNF, ZnO <sub>0.6</sub> @CNF and ZnO <sub>0.7</sub> @CNF.....                       | 4 |
| Fig. S4 SEM images of CNF, ZnO <sub>0.6</sub> @CNF, Cu-ZnO <sub>0.6</sub> @CNF, Ni-ZnO <sub>0.6</sub> @CNF and Cu/Ni-ZnO <sub>0.6</sub> @CNF.....                                                           | 4 |
| Fig. S5 EDS mapping of ZnO <sub>0.6</sub> @CNF, Cu-ZnO <sub>0.6</sub> @CNF, Ni-ZnO <sub>0.6</sub> @CNF and Cu/Ni-ZnO <sub>0.6</sub> @CNF.....                                                               | 5 |
| Fig. S6 Full survey XPS spectra of pristine and doped ZnO <sub>0.6</sub> @CNF nanocomposites.....                                                                                                           | 6 |
| Fig. S7 XPS spectra of pristine and doped ZnO <sub>0.6</sub> @CNF nanocomposites: (a) Zn 2p, (b) O 1s, (c) Cu 2p and (d) Ni 2p.....                                                                         | 6 |
| Fig. S8 (a) XRD patterns and (b) FTIR spectra of CNF, ZnO <sub>0.6</sub> @CNF, Cu-ZnO <sub>0.6</sub> @CNF, Ni-ZnO <sub>0.6</sub> @CNF and Cu/Ni-ZnO <sub>0.6</sub> @CNF.....                                | 7 |
| Fig. S9 BET curves of pristine and doped ZnO <sub>0.6</sub> @CNF nanocomposites.....                                                                                                                        | 7 |
| Fig. S10 (a) the UV-vis diffuse reflectance spectra and (b) band gap energy of CNF, ZnO <sub>0.6</sub> @CNF, Cu-ZnO <sub>0.6</sub> @CNF, Ni-ZnO <sub>0.6</sub> @CNF and Cu/Ni-ZnO <sub>0.6</sub> @CNF.....  | 7 |
| Fig. S11 (a) PL spectra, (b) photocurrent response curve and (c) EIS of pristine and doped ZnO <sub>0.6</sub> @CNF nanocomposites.....                                                                      | 8 |
| Fig. S12 LC-MS results of visible light photocatalytic degradation of wastewater pollutants.....                                                                                                            | 8 |
| Tab. S1 Structural parameters of pristine and doped ZnO <sub>0.6</sub> @CNF nanocomposites.....                                                                                                             | 9 |

---

## Experimental

### Catalyst characterization

Fourier transform infrared spectroscopy (FT-IR) was performed on a Nicolet 6700 by using the KBr pellet technique with a resolution of 2 cm<sup>-1</sup> from 500 to 4000 cm<sup>-1</sup> and consisted of 32 scans at room temperature. The BET surface area of the catalyst was measured by the adsorption of N<sub>2</sub> at -196 °C (Micromeritics, ASAP2460, USA). The X-ray diffraction (XRD) patterns were obtained using an X-ray diffractometer (Bruker, D8 advance, Germany) operated with Cu-Kα radiation at 40 kV and 40 mA with a scanning rate of 2 degree·min<sup>-1</sup>. The crystallite size (D) was calculated using the Debye-Scherrer formula (1) and the microstrain (ε) using the following equations (2), as follows:<sup>1</sup>

$$D = \frac{k\lambda}{\beta \cos\theta} \quad (1)$$

$$\varepsilon = \frac{\beta}{4 \tan\theta} \quad (2)$$

where k is the constant (k = 0.9), θ is the Bragg diffraction angle, λ is the X-ray source wavelength (λ = 1.54056 Å), and β is the full width at half maximum (FWHM). X-Ray photoelectron spectroscopy (XPS) was carried out at 15 kV and 5 mA (Shimadzu, AXIS Ultra DLD, Japan), with the binding energies calibrated at 284.6 eV from C 1s of the adventitious carbon. Scanning electron microscopy (Hitachi, SU8010, Japan) for the sample morphology was conducted at 10 kV and 10 mA. The elemental distribution of the ZnO@CNF nanocomposites was studied using energy dispersive spectrometry (EDS). Additionally, the optical absorption spectra of the specimens were corroborated using a UV-Vis spectrum analyzer (PerkinElmer, Lambda 650S, USA) equipped with an integrated sphere (BaSO<sub>4</sub> was used as the reference). Photoluminescence (PL) spectra were obtained at room temperature on a fluorescence lifetime spectrophotometer (Horiba, Quanta Master 8000, Canada) with an excitation wavelength of 370 nm. Thermogravimetric analysis (TGA) was conducted under N<sub>2</sub> atmosphere with a programmed heating rate of 10 °C/min from 50 to 800 °C (PerkinElmer, STA8000, USA).

The photocurrent response measurements were conducted on a CHI760E electrochemical workstation in a three-electrode system. The catalyst powder (10 mg) was ultrasonicated in a 5% ethanol solution to obtain a slurry. After that, 150 μL slurry was dispersed onto Indium tin oxide (ITO) glass with drying treatment at room temperature. The electrodes were immersed in 0.5 mol L<sup>-1</sup> sodium sulfate aqueous solution. The counter electrode and reference electrode were the platinum plate and silver-silver chloride electrodes, respectively. For electrochemical impedance spectroscopy (EIS) experiments, the perturbation signal was 5 mV, and the frequency ranged from 0.1-100 kHz. The working electrode was irradiated with a 300 W xenon lamp during the measurement.

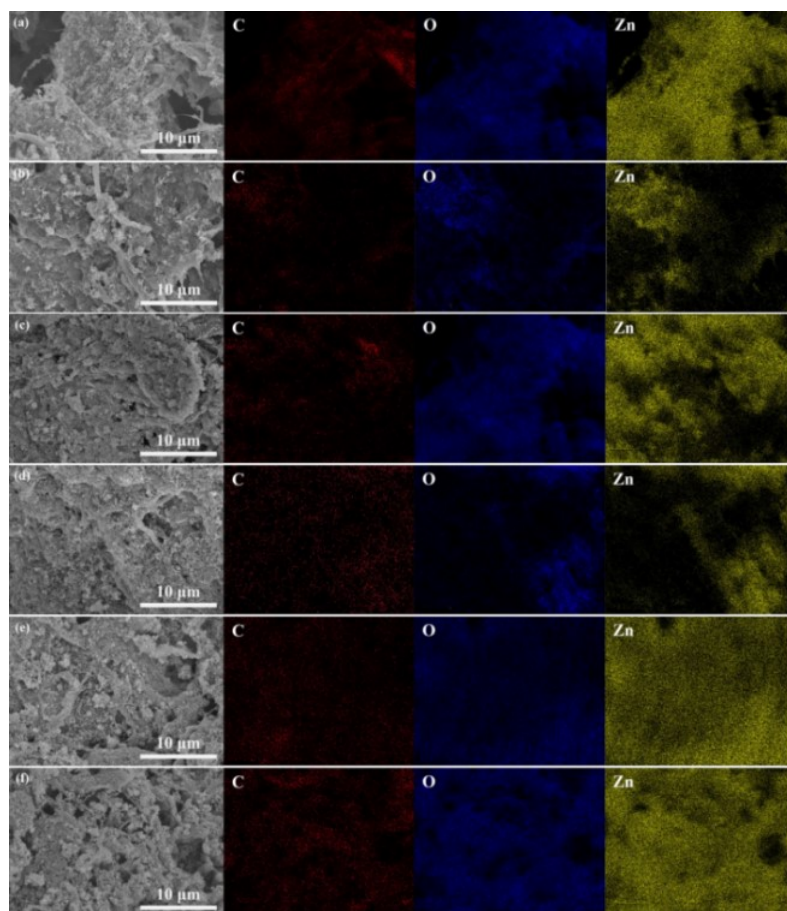

Fig. S1 EDS mapping of (a)  $\text{ZnO}_{0.2}$ @CNF, (b)  $\text{ZnO}_{0.3}$ @CNF, (c)  $\text{ZnO}_{0.4}$ @CNF, (d)  $\text{ZnO}_{0.5}$ @CNF, (e)  $\text{ZnO}_{0.6}$ @CNF and (f)  $\text{ZnO}_{0.7}$ @CNF.

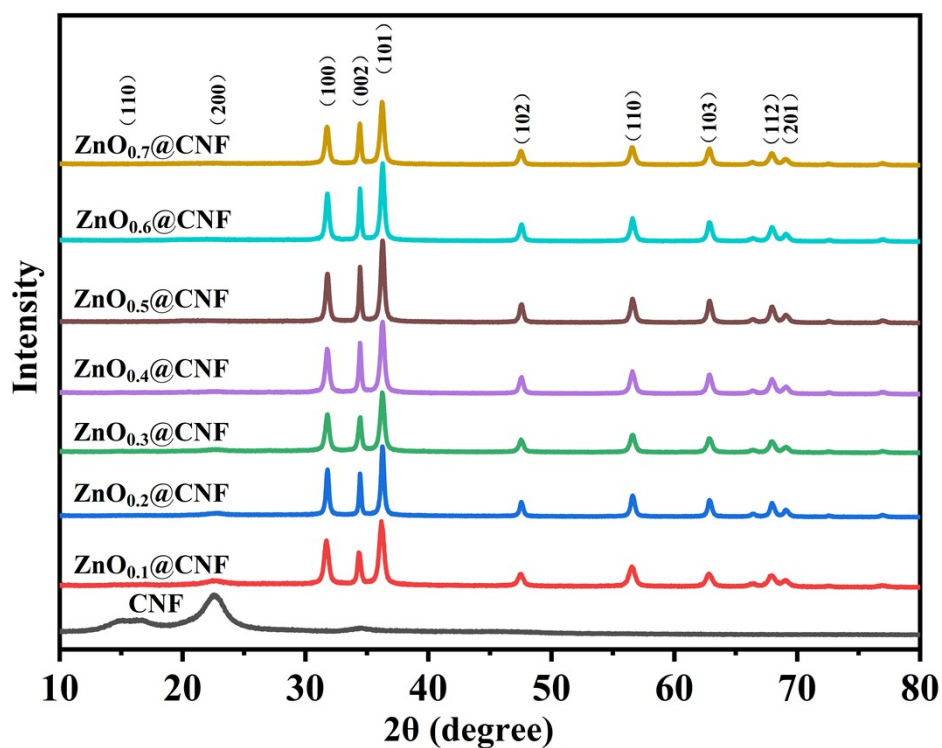

Fig. S2 XRD patterns of  $\text{ZnO}_{0.2}$ @CNF,  $\text{ZnO}_{0.3}$ @CNF,  $\text{ZnO}_{0.4}$ @CNF,  $\text{ZnO}_{0.5}$ @CNF,  $\text{ZnO}_{0.6}$ @CNF and  $\text{ZnO}_{0.7}$ @CNF.

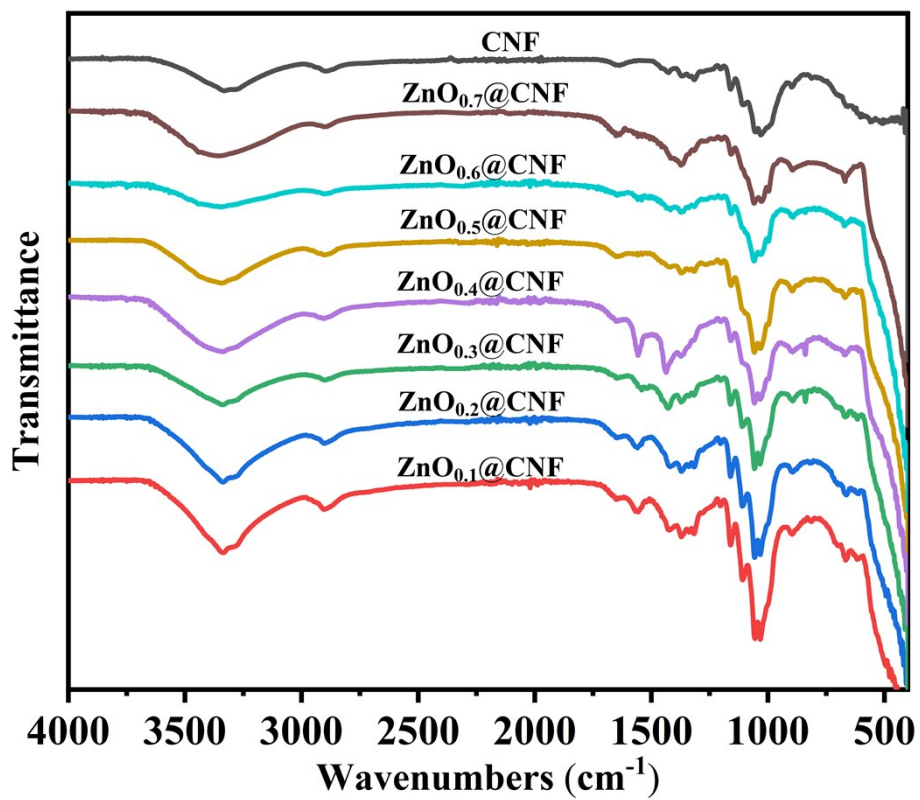

Fig. S3 FT-IR spectra of ZnO<sub>0.2</sub>@CNF, ZnO<sub>0.3</sub>@CNF, ZnO<sub>0.4</sub>@CNF, ZnO<sub>0.5</sub>@CNF, ZnO<sub>0.6</sub>@CNF and ZnO<sub>0.7</sub>@CNF.

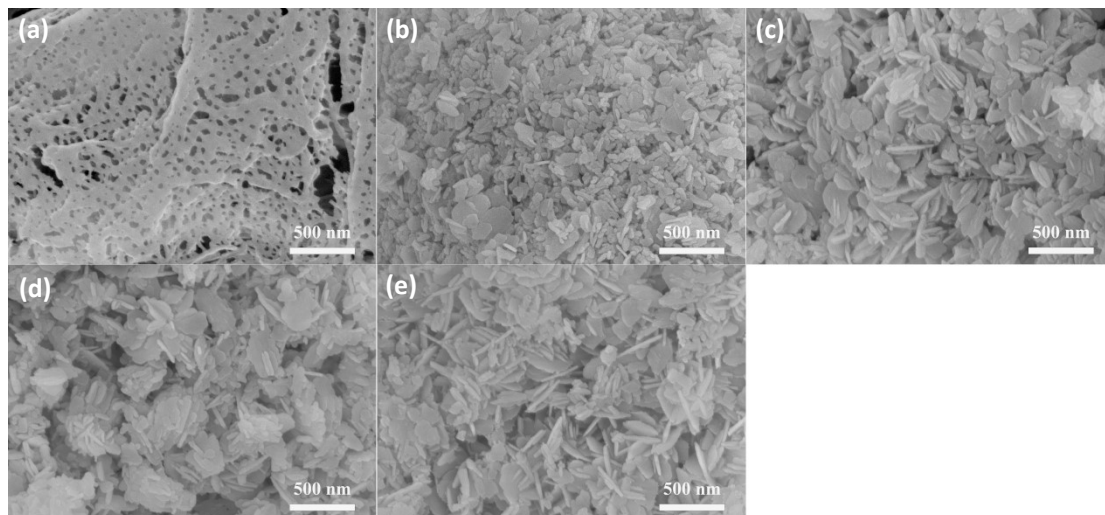

Fig. S4 SEM images of CNF, ZnO<sub>0.6</sub>@CNF, Cu-ZnO<sub>0.6</sub>@CNF, Ni-ZnO<sub>0.6</sub>@CNF and Cu/Ni-ZnO<sub>0.6</sub>@CNF.

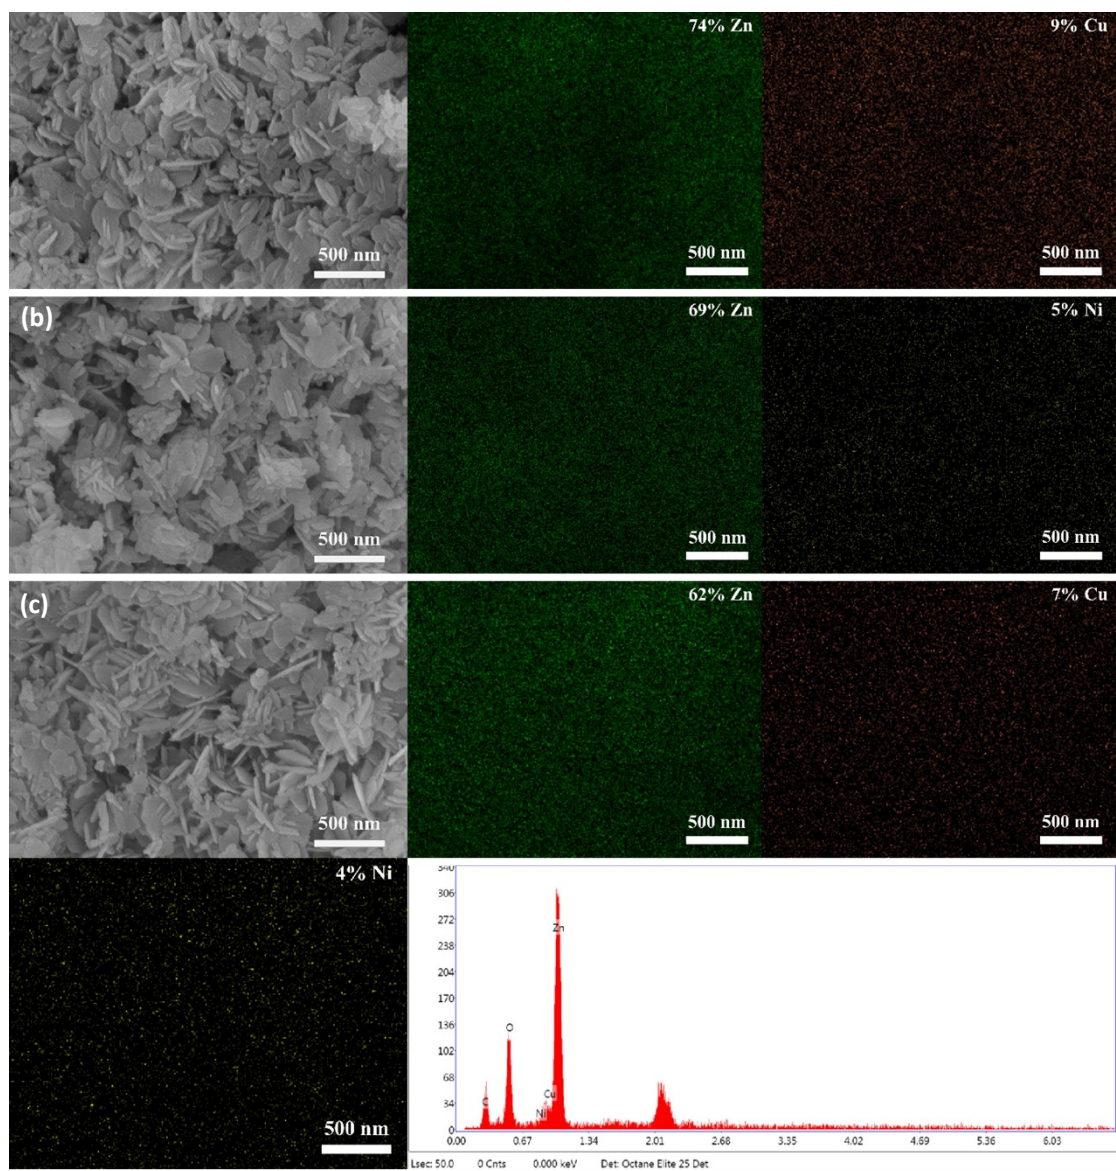

Fig. S5 EDS mapping of ZnO<sub>0.6</sub>@CNF, Cu-ZnO<sub>0.6</sub>@CNF, Ni-ZnO<sub>0.6</sub>@CNF and Cu/Ni-ZnO<sub>0.6</sub>@CNF.

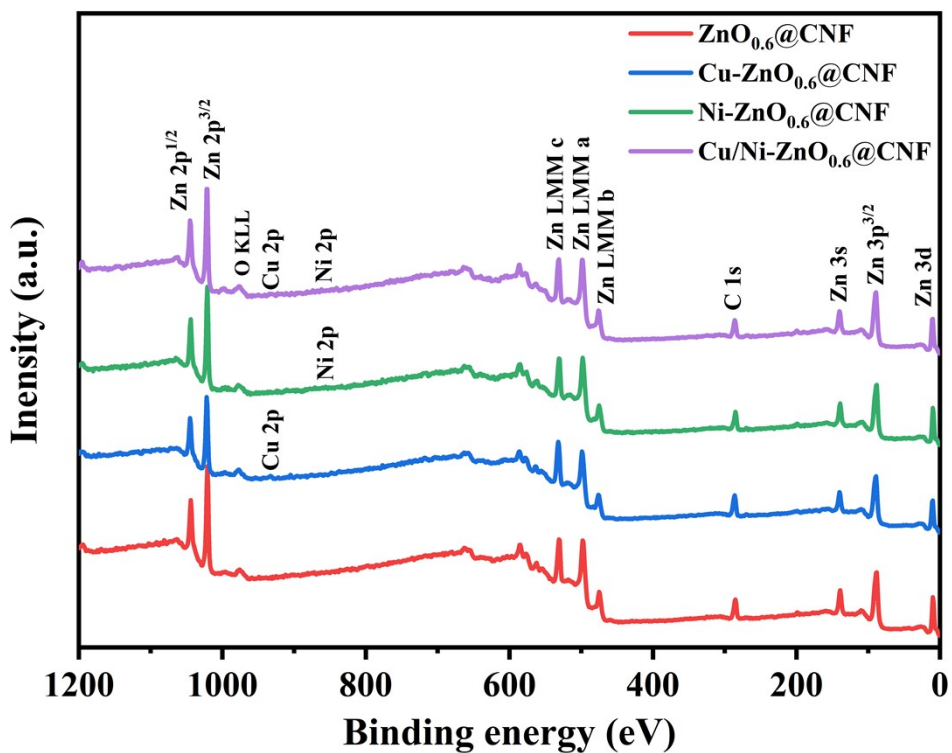

Fig. S6 Full survey XPS spectra of pristine and doped  $\text{ZnO}_{0.6}@CNF$  nanocomposites.

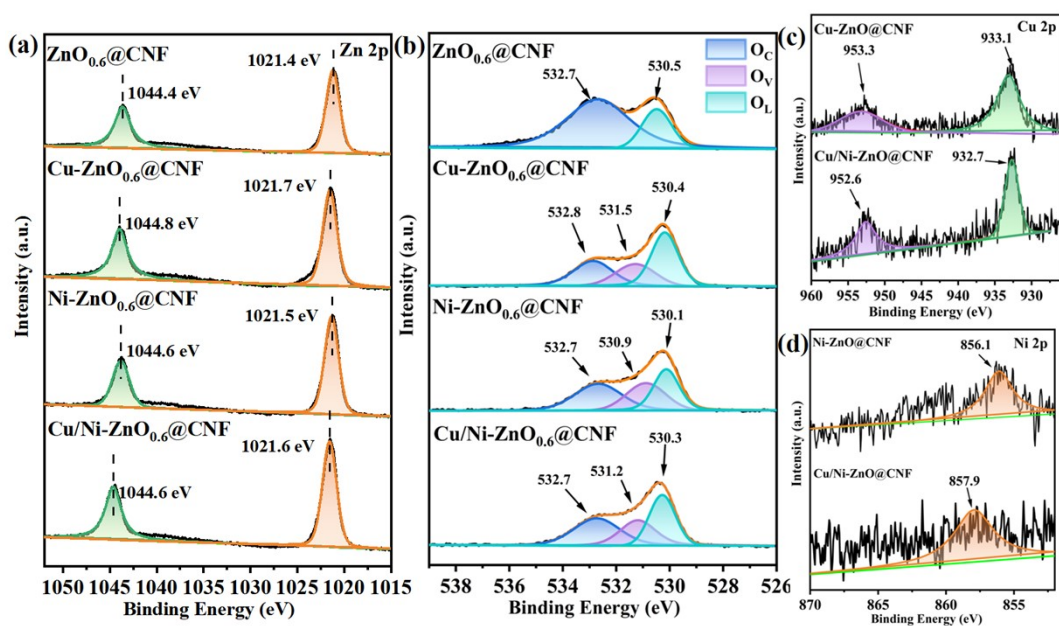

Fig. S7 XPS spectra of pristine and doped  $\text{ZnO}_{0.6}@CNF$  nanocomposites: (a) Zn 2p, (b) O 1s, (c) Cu 2p and (d) Ni 2p.

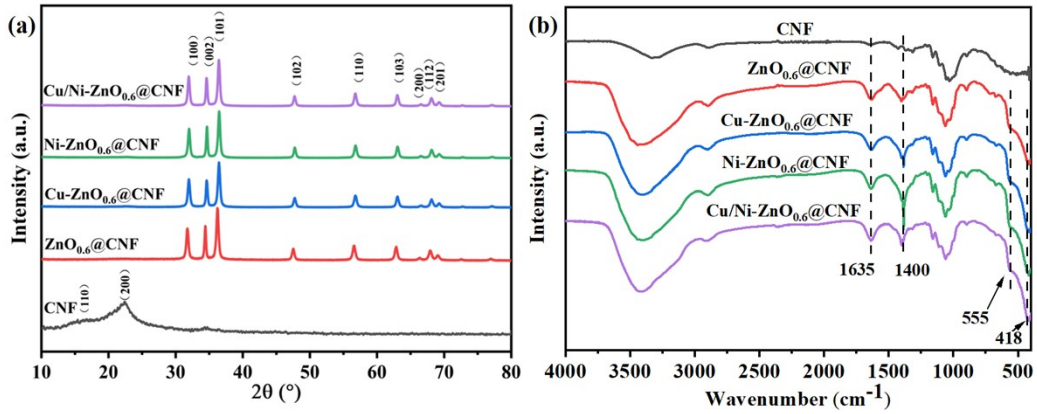

Fig. S8 (a) XRD patterns and (b) FTIR spectra of CNF,  $\text{ZnO}_{0.6}@CNF$ ,  $\text{Cu-ZnO}_{0.6}@CNF$ ,  $\text{Ni-ZnO}_{0.6}@CNF$  and  $\text{Cu/Ni-ZnO}_{0.6}@CNF$ .

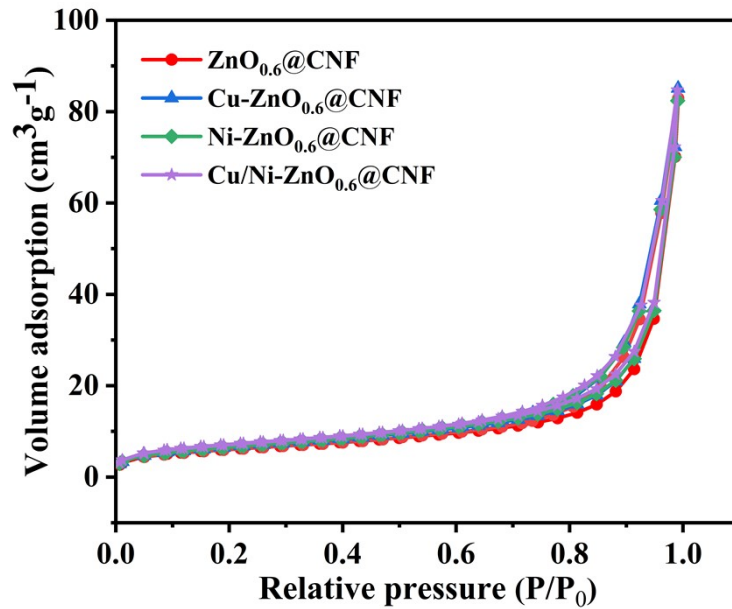

Fig. S9 BET curves of pristine and doped  $\text{ZnO}_{0.6}@CNF$  nanocomposites.

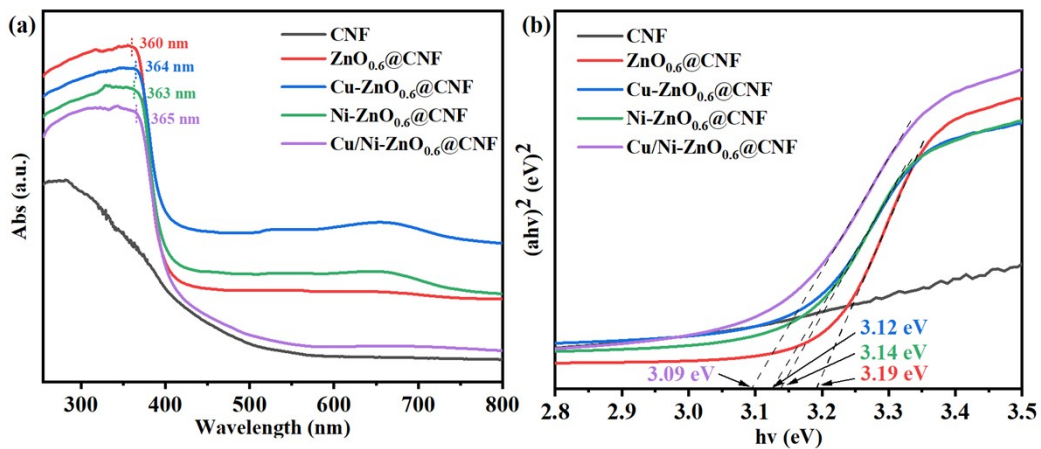

Fig. S10 (a) the UV-vis diffuse reflectance spectra and (b) band gap energy of CNF,  $\text{ZnO}_{0.6}@CNF$ ,  $\text{Cu-ZnO}_{0.6}@CNF$ ,  $\text{Ni-ZnO}_{0.6}@CNF$  and  $\text{Cu/Ni-ZnO}_{0.6}@CNF$ .

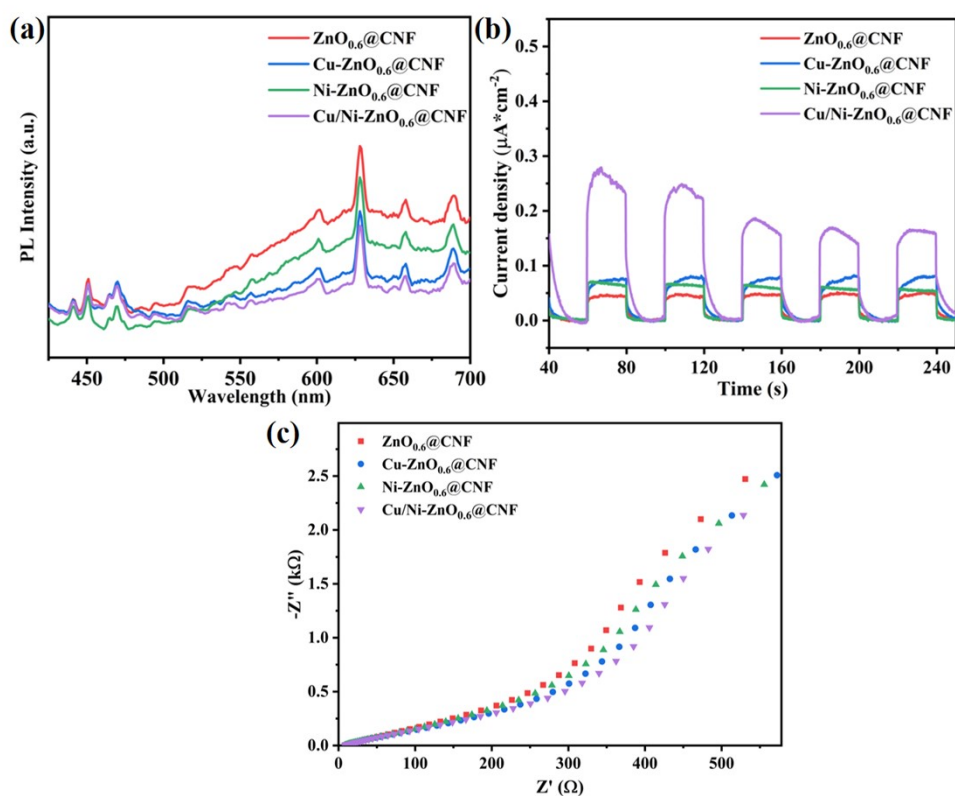

Fig. S11 (a) PL spectra, (b) photocurrent response curve and (c) EIS of pristine and doped ZnO<sub>0.6</sub>@CNF nanocomposites.

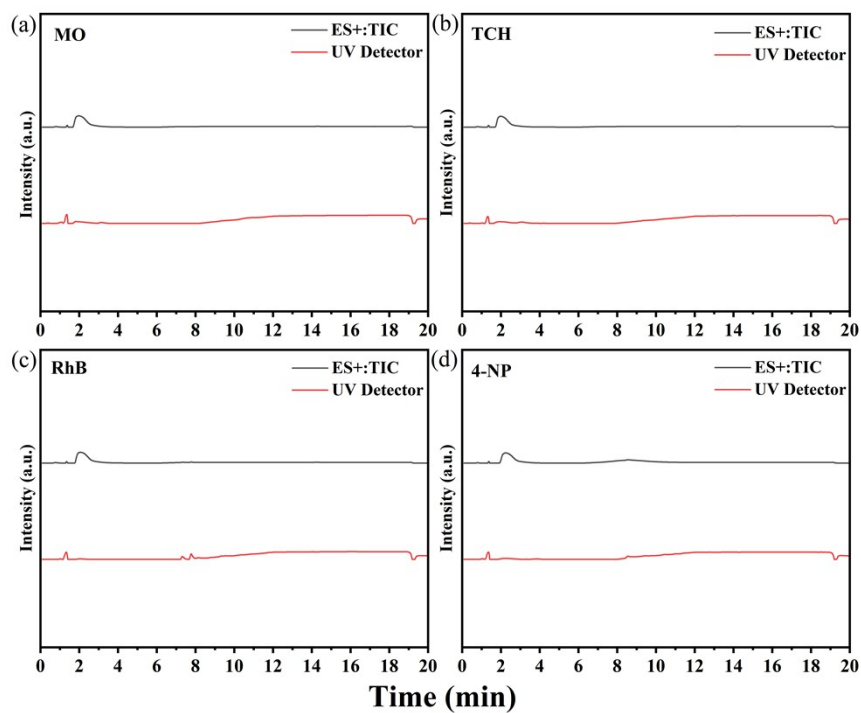

Fig. S12 LC-MS results of visible light photocatalytic degradation of wastewater pollutants



Tab. S1 Structural parameters of pristine and doped ZnO<sub>0.6</sub>@CNF nanocomposites.

| Samples                           | (h,k,l) | 2θ<br>/deg | d    | β<br>/deg | D<br>/nm | ε /10 <sup>-3</sup> |
|-----------------------------------|---------|------------|------|-----------|----------|---------------------|
| ZnO <sub>0.6</sub> @CNF           | 100     | 31.8       | 2.82 | 0.38      | 20.4     | 1.14                |
|                                   | 002     | 34.4       | 2.60 | 0.25      | 31.0     | 0.76                |
|                                   | 101     | 36.2       | 2.48 | 0.37      | 20.2     | 1.16                |
| Cu-ZnO <sub>0.6</sub> @CNF        | 100     | 32.0       | 2.80 | 0.40      | 19.0     | 1.22                |
|                                   | 002     | 34.6       | 2.59 | 0.29      | 26.5     | 0.88                |
|                                   | 101     | 36.5       | 2.46 | 0.39      | 19.3     | 1.22                |
| Ni-ZnO <sub>0.6</sub> @CNF        | 100     | 32.0       | 2.80 | 0.39      | 19.7     | 1.18                |
|                                   | 002     | 34.3       | 2.46 | 0.28      | 27.4     | 0.86                |
|                                   | 101     | 36.5       | 2.46 | 0.38      | 20.0     | 1.18                |
| Cu/Ni-<br>ZnO <sub>0.6</sub> @CNF | 100     | 31.9       | 2.80 | 0.38      | 19.7     | 1.18                |
|                                   | 002     | 34.6       | 2.59 | 0.28      | 27.4     | 0.86                |
|                                   | 101     | 36.5       | 2.46 | 0.38      | 20.0     | 1.18                |

Notes and references

1. A. Arfaoui, A. Mhamdi, B. Khalfallah, S. Belgacem and M. Amlouk, *Appl. Phys. A*, 2019, **125**, 517.
